# Supplementary material
Source: MDPI journal article supplement (https://www.mdpi.com/2071-1050/14/4/2254)
Supplement: s1 [file s1]

Table S1. Measurement Model 2 results. Posterior estimates

|                                                | Mean   | S.E.   | S.D.   | C.S.   | Median | 95%<br>Lower<br>bound | 95%<br>Upper<br>bound | Skewness | Kurtosis | Min    | Max    |
|------------------------------------------------|--------|--------|--------|--------|--------|-----------------------|-----------------------|----------|----------|--------|--------|
| Career_development<->Recruitment_selection     | 0.6502 | 0.0020 | 0.0957 | 1.0002 | 0.6461 | 0.4721                | 0.8497                | 0.2324   | 0.1022   | 0.3226 | 1.0868 |
| Recognition_value<->Participation_research     | 1.3629 | 0.0032 | 0.1344 | 1.0003 | 1.3565 | 1.1154                | 1.6432                | 0.2336   | -0.0078  | 0.9001 | 2.0188 |
| Work_incentives<->Recognition_value            | 1.2098 | 0.0026 | 0.1204 | 1.0002 | 1.2037 | 0.9906                | 1.4615                | 0.2710   | 0.1270   | 0.7878 | 1.7952 |
| Career_development<->Participation_research    | 0.9874 | 0.0025 | 0.1024 | 1.0003 | 0.9824 | 0.8025                | 1.2047                | 0.3287   | 0.1539   | 0.5630 | 1.4371 |
| Career_development<->Recognition_value         | 0.7496 | 0.0017 | 0.0797 | 1.0002 | 0.7462 | 0.6044                | 0.9171                | 0.2928   | 0.1980   | 0.4295 | 1.1371 |
| Work_incentives<->Career_development           | 0.9675 | 0.0021 | 0.0969 | 1.0002 | 0.9619 | 0.7911                | 1.1728                | 0.2816   | 0.0928   | 0.5587 | 1.3862 |
| Work_incentives<->Recruitment_selection        | 0.8485 | 0.0027 | 0.1319 | 1.0002 | 0.8445 | 0.6028                | 1.1217                | 0.2113   | 0.0964   | 0.4003 | 1.4560 |
| Work_incentives<->Participation_research       | 1.4761 | 0.0037 | 0.1495 | 1.0003 | 1.4696 | 1.2030                | 1.7850                | 0.2566   | 0.0181   | 0.9705 | 2.1737 |
| Recruitment_selection<->Recognition_value      | 0.8232 | 0.0022 | 0.1143 | 1.0002 | 0.8184 | 0.6136                | 1.0624                | 0.2569   | 0.1823   | 0.3831 | 1.3741 |
| Career_development<->Job_payment               | 1.2936 | 0.0029 | 0.1277 | 1.0003 | 1.2887 | 1.0553                | 1.5605                | 0.2330   | 0.1330   | 0.8250 | 1.9221 |
| Job_payment<->Recognition_value                | 0.8936 | 0.0026 | 0.1302 | 1.0002 | 0.8889 | 0.6495                | 1.1600                | 0.1516   | 0.0412   | 0.3484 | 1.4405 |
| Job_payment<->Participation_research           | 1.4188 | 0.0036 | 0.1651 | 1.0002 | 1.4117 | 1.1127                | 1.7619                | 0.2364   | 0.1724   | 0.8427 | 2.2743 |
| Work_incentives<->Job_payment                  | 1.4017 | 0.0037 | 0.1633 | 1.0002 | 1.3977 | 1.0946                | 1.7333                | 0.1319   | 0.0029   | 0.7017 | 2.0485 |
| Job_payment<->Recruitment_selection            | 0.9572 | 0.0038 | 0.1787 | 1.0002 | 0.9537 | 0.6193                | 1.3211                | 0.1423   | 0.0619   | 0.2560 | 1.6597 |
| Recruitment_selection<->Participation_research | 0.9451 | 0.0030 | 0.1356 | 1.0002 | 0.9395 | 0.6941                | 1.2252                | 0.2418   | 0.1523   | 0.4625 | 1.5540 |

|                             | Mean   | S.E.   | S.D.   | C.S.   | Median | 95%<br>Lower<br>bound | 95%<br>Upper<br>bound | Skewness | Kurtosis | Min    | Max    |
|-----------------------------|--------|--------|--------|--------|--------|-----------------------|-----------------------|----------|----------|--------|--------|
| Regression weights          |        |        |        |        |        |                       |                       |          |          |        |        |
| MANAG4<--Career_development | 0.9571 | 0.0014 | 0.0672 | 1.0002 | 0.9549 | 0.8320                | 1.0957                | 0.2051   | 0.1806   | 0.6857 | 1.2906 |
| MANAG3<--Career_development | 1.0381 | 0.0015 | 0.0698 | 1.0002 | 1.0354 | 0.9094                | 1.1843                | 0.2849   | 0.2936   | 0.8015 | 1.3756 |
| MANAG2<--Career_development | 1.1238 | 0.0014 | 0.0665 | 1.0002 | 1.1219 | 0.9980                | 1.2596                | 0.1470   | 0.0580   | 0.8882 | 1.4006 |
| MANAG1<--Career_development | 1.3152 | 0.0017 | 0.0758 | 1.0002 | 1.3121 | 1.1742                | 1.4721                | 0.2329   | 0.1836   | 1.0462 | 1.6456 |
| CD8<--Career_development    | 1.2578 | 0.0017 | 0.0852 | 1.0002 | 1.2544 | 1.1003                | 1.4368                | 0.2243   | 0.0972   | 0.9410 | 1.6024 |
| CD7<--Career_development    | 1.4823 | 0.0021 | 0.0846 | 1.0003 | 1.4798 | 1.3225                | 1.6561                | 0.1959   | 0.1815   | 1.1764 | 1.9142 |
| CD6<--Career_development    | 1.3688 | 0.0017 | 0.0775 | 1.0002 | 1.3657 | 1.2253                | 1.5277                | 0.2114   | 0.1558   | 1.0668 | 1.7973 |
| CD5<--Career_development    | 1.4463 | 0.0021 | 0.0853 | 1.0003 | 1.4444 | 1.2847                | 1.6192                | 0.1552   | 0.0232   | 1.1606 | 1.8250 |
| CD4<--Career_development    | 1.4569 | 0.0019 | 0.0832 | 1.0003 | 1.4535 | 1.3019                | 1.6283                | 0.2037   | 0.0571   | 1.1601 | 1.8349 |
| CD3<--Career_development    | 0.9448 | 0.0012 | 0.0612 | 1.0002 | 0.9433 | 0.8309                | 1.0702                | 0.1821   | 0.0180   | 0.7265 | 1.2189 |
| CD2<--Career_development    | 1.0985 | 0.0017 | 0.0722 | 1.0003 | 1.0962 | 0.9632                | 1.2461                | 0.1870   | 0.0763   | 0.7889 | 1.4228 |
| CD1<--Career_development    | 1.0429 | 0.0016 | 0.0774 | 1.0002 | 1.0412 | 0.8966                | 1.2007                | 0.1322   | 0.0214   | 0.7577 | 1.3927 |
| SAL1<--Job_payment          | 0.8779 | 0.0011 | 0.0515 | 1.0002 | 0.8772 | 0.7780                | 0.9812                | 0.0761   | 0.0283   | 0.6836 | 1.0958 |
| RS2<--Recruitment_selection | 1.3654 | 0.0016 | 0.0735 | 1.0002 | 1.3613 | 1.2320                | 1.5194                | 0.3038   | 0.2077   | 1.0759 | 1.7289 |
| RS3<--Recruitment_selection | 1.3565 | 0.0020 | 0.0789 | 1.0003 | 1.3526 | 1.2125                | 1.5239                | 0.2814   | 0.0639   | 1.1014 | 1.7193 |
| RS4<--Recruitment_selection | 1.4026 | 0.0020 | 0.0839 | 1.0003 | 1.3986 | 1.2492                | 1.5764                | 0.2391   | -0.0256  | 1.0972 | 1.8023 |
| RE4<--Recognition_value     | 1.1244 | 0.0015 | 0.0711 | 1.0002 | 1.1232 | 0.9894                | 1.2680                | 0.1393   | 0.0476   | 0.8434 | 1.4803 |
| RE5<--Recognition_value     | 1.1583 | 0.0015 | 0.0661 | 1.0002 | 1.1557 | 1.0362                | 1.2953                | 0.2202   | 0.0511   | 0.9306 | 1.4668 |
| RE7<--Recognition_value     | 1.0297 | 0.0012 | 0.0582 | 1.0002 | 1.0277 | 0.9210                | 1.1505                | 0.2095   | 0.1131   | 0.8118 | 1.2923 |
| RE8<--Recognition_value     | 1.0980 | 0.0013 | 0.0602 | 1.0002 | 1.0961 | 0.9850                | 1.2192                | 0.1779   | 0.0510   | 0.8505 | 1.3794 |
| RE9<--Recognition_value     | 0.9635 | 0.0013 | 0.0614 | 1.0002 | 0.9612 | 0.8489                | 1.0922                | 0.2436   | 0.2561   | 0.7472 | 1.2493 |
| RE10<--Recognition_value    | 1.0517 | 0.0013 | 0.0597 | 1.0002 | 1.0490 | 0.9402                | 1.1748                | 0.2079   | 0.0573   | 0.8414 | 1.3285 |

|                               |        |        |        |        |        |        |        |         |         |        |        |
|-------------------------------|--------|--------|--------|--------|--------|--------|--------|---------|---------|--------|--------|
| RE11<--Recognition_value      | 1.1253 | 0.0015 | 0.0697 | 1.0002 | 1.1228 | 0.9964 | 1.2688 | 0.2209  | 0.0658  | 0.8946 | 1.4246 |
| RE12<--Recognition_value      | 1.1978 | 0.0015 | 0.0640 | 1.0003 | 1.1958 | 1.0788 | 1.3290 | 0.1948  | -0.0181 | 0.9980 | 1.4706 |
| RE17<--Recognition_value      | 0.9610 | 0.0014 | 0.0624 | 1.0003 | 0.9593 | 0.8431 | 1.0889 | 0.1611  | 0.0104  | 0.7235 | 1.2508 |
| RE19<--Participation_research | 0.9433 | 0.0013 | 0.0622 | 1.0002 | 0.9414 | 0.8265 | 1.0712 | 0.1858  | 0.0208  | 0.7238 | 1.2103 |
| RE18<--Participation_research | 1.0101 | 0.0014 | 0.0653 | 1.0002 | 1.0077 | 0.8878 | 1.1463 | 0.2268  | 0.2001  | 0.7834 | 1.3333 |
| RE15<--Participation_research | 1.0835 | 0.0016 | 0.0660 | 1.0003 | 1.0807 | 0.9626 | 1.2195 | 0.2322  | 0.1195  | 0.8450 | 1.3670 |
| RE14<--Participation_research | 0.8382 | 0.0011 | 0.0520 | 1.0002 | 0.8363 | 0.7405 | 0.9437 | 0.1869  | 0.1071  | 0.6548 | 1.0839 |
| RE13<--Participation_research | 1.1364 | 0.0016 | 0.0679 | 1.0003 | 1.1337 | 1.0084 | 1.2761 | 0.1857  | 0.0351  | 0.8603 | 1.4255 |
| RE6<--Participation_research  | 0.9763 | 0.0012 | 0.0584 | 1.0002 | 0.9741 | 0.8677 | 1.0969 | 0.2182  | 0.1785  | 0.7708 | 1.2213 |
| WI2<--Work_incentives         | 1.2241 | 0.0017 | 0.0747 | 1.0003 | 1.2218 | 1.0833 | 1.3760 | 0.1975  | 0.1282  | 0.9560 | 1.5839 |
| WI3<--Work_incentives         | 1.2851 | 0.0018 | 0.0753 | 1.0003 | 1.2829 | 1.1465 | 1.4393 | 0.2153  | 0.0888  | 0.9976 | 1.6274 |
| WI4<--Work_incentives         | 1.1779 | 0.0015 | 0.0665 | 1.0002 | 1.1755 | 1.0522 | 1.3137 | 0.1581  | 0.0492  | 0.9166 | 1.4708 |
| WI5<--Work_incentives         | 0.9240 | 0.0010 | 0.0518 | 1.0002 | 0.9230 | 0.8249 | 1.0292 | 0.1061  | 0.0338  | 0.7247 | 1.1283 |
|                               |        |        |        |        |        |        |        |         |         |        |        |
| Intercepts                    |        |        |        |        |        |        |        |         |         |        |        |
|                               |        |        |        |        |        |        |        |         |         |        |        |
| MANAG5                        | 4.0304 | 0.0010 | 0.0629 | 1.0001 | 4.0306 | 3.9068 | 4.1522 | -0.0146 | -0.0325 | 3.7859 | 4.3104 |
| MANAG4                        | 3.9289 | 0.0015 | 0.0676 | 1.0002 | 3.9286 | 3.7972 | 4.0625 | 0.0513  | 0.0621  | 3.6525 | 4.2330 |
| MANAG3                        | 3.9542 | 0.0014 | 0.0692 | 1.0002 | 3.9543 | 3.8158 | 4.0881 | -0.0401 | 0.0252  | 3.6891 | 4.2438 |
| MANAG2                        | 3.7819 | 0.0012 | 0.0660 | 1.0002 | 3.7825 | 3.6516 | 3.9102 | -0.0442 | -0.0113 | 3.5157 | 4.0168 |
| MANAG1                        | 2.9619 | 0.0014 | 0.0740 | 1.0002 | 2.9624 | 2.8163 | 3.1079 | -0.0069 | 0.0313  | 2.6538 | 3.2668 |
| CD8                           | 2.8535 | 0.0016 | 0.0840 | 1.0002 | 2.8548 | 2.6864 | 3.0154 | -0.0484 | -0.0129 | 2.5202 | 3.1814 |
| CD7                           | 3.0212 | 0.0018 | 0.0816 | 1.0002 | 3.0216 | 2.8591 | 3.1793 | -0.0379 | 0.0265  | 2.6902 | 3.3435 |
| CD6                           | 3.3710 | 0.0014 | 0.0761 | 1.0002 | 3.3716 | 3.2196 | 3.5177 | -0.0536 | 0.0416  | 3.0502 | 3.6722 |
| CD5                           | 2.5632 | 0.0015 | 0.0836 | 1.0002 | 2.5627 | 2.4013 | 2.7276 | 0.0394  | 0.0876  | 2.2057 | 2.9462 |
| CD4                           | 3.1475 | 0.0015 | 0.0810 | 1.0002 | 3.1468 | 2.9892 | 3.3077 | 0.0201  | -0.1018 | 2.8287 | 3.4574 |
| CD3                           | 4.0205 | 0.0011 | 0.0617 | 1.0002 | 4.0206 | 3.8972 | 4.1405 | -0.0512 | 0.0295  | 3.7854 | 4.2522 |

|      |        |        |        |        |        |        |        |         |         |        |        |
|------|--------|--------|--------|--------|--------|--------|--------|---------|---------|--------|--------|
| CD2  | 3.7738 | 0.0015 | 0.0741 | 1.0002 | 3.7746 | 3.6271 | 3.9178 | -0.0269 | -0.0337 | 3.4946 | 4.0813 |
| CD1  | 3.9728 | 0.0014 | 0.0763 | 1.0002 | 3.9729 | 3.8232 | 4.1204 | -0.0137 | 0.0425  | 3.6782 | 4.3039 |
| SAL2 | 3.2478 | 0.0016 | 0.0943 | 1.0001 | 3.2478 | 3.0635 | 3.4341 | 0.0040  | -0.0417 | 2.8899 | 3.6287 |
| SAL1 | 3.7809 | 0.0017 | 0.0930 | 1.0002 | 3.7820 | 3.5980 | 3.9617 | -0.0199 | -0.0274 | 3.4027 | 4.1456 |
| RS1  | 2.0601 | 0.0019 | 0.1017 | 1.0002 | 2.0612 | 1.8603 | 2.2591 | -0.0390 | 0.0015  | 1.6491 | 2.4927 |
| RS2  | 2.4734 | 0.0022 | 0.1128 | 1.0002 | 2.4735 | 2.2506 | 2.6937 | -0.0345 | 0.0660  | 1.9420 | 2.9170 |
| RS3  | 2.6527 | 0.0021 | 0.1130 | 1.0002 | 2.6523 | 2.4336 | 2.8747 | 0.0245  | 0.0427  | 2.1264 | 3.1900 |
| RS4  | 2.9158 | 0.0023 | 0.1161 | 1.0002 | 2.9162 | 2.6889 | 3.1437 | 0.0095  | 0.0538  | 2.3724 | 3.4269 |
| RE3  | 3.9288 | 0.0014 | 0.0711 | 1.0002 | 3.9288 | 3.7887 | 4.0687 | -0.0019 | 0.0455  | 3.6558 | 4.2285 |
| RE4  | 2.4999 | 0.0018 | 0.0870 | 1.0002 | 2.5007 | 2.3268 | 2.6681 | -0.0409 | -0.0203 | 2.1623 | 2.8602 |
| RE5  | 3.0035 | 0.0014 | 0.0779 | 1.0002 | 3.0030 | 2.8521 | 3.1602 | 0.0308  | 0.0531  | 2.6051 | 3.3376 |
| RE7  | 3.5366 | 0.0014 | 0.0722 | 1.0002 | 3.5365 | 3.3973 | 3.6787 | 0.0200  | 0.0450  | 3.2015 | 3.8435 |
| RE8  | 3.1161 | 0.0015 | 0.0730 | 1.0002 | 3.1159 | 2.9723 | 3.2592 | 0.0013  | -0.0029 | 2.7816 | 3.4158 |
| RE9  | 2.9941 | 0.0014 | 0.0721 | 1.0002 | 2.9937 | 2.8545 | 3.1343 | 0.0090  | -0.0676 | 2.6797 | 3.2648 |
| RE10 | 3.7576 | 0.0014 | 0.0731 | 1.0002 | 3.7569 | 3.6140 | 3.9013 | 0.0002  | 0.0128  | 3.4398 | 4.0552 |
| RE11 | 2.6333 | 0.0016 | 0.0821 | 1.0002 | 2.6327 | 2.4716 | 2.7944 | 0.0056  | 0.0413  | 2.2488 | 2.9693 |
| RE12 | 3.0012 | 0.0015 | 0.0763 | 1.0002 | 3.0013 | 2.8528 | 3.1525 | 0.0146  | 0.0287  | 2.6836 | 3.3206 |
| RE17 | 2.8340 | 0.0015 | 0.0724 | 1.0002 | 2.8349 | 2.6886 | 2.9726 | -0.0681 | 0.0265  | 2.5329 | 3.1060 |
| RE20 | 3.0544 | 0.0018 | 0.0891 | 1.0002 | 3.0546 | 2.8816 | 3.2316 | 0.0356  | -0.0684 | 2.7013 | 3.3987 |
| RE19 | 3.3335 | 0.0014 | 0.0805 | 1.0002 | 3.3345 | 3.1736 | 3.4919 | -0.0330 | 0.0489  | 3.0198 | 3.6472 |
| RE18 | 3.0997 | 0.0019 | 0.0869 | 1.0002 | 3.0989 | 2.9306 | 3.2714 | 0.0039  | -0.0199 | 2.7068 | 3.4582 |
| RE15 | 3.4823 | 0.0018 | 0.0844 | 1.0002 | 3.4817 | 3.3165 | 3.6484 | 0.0277  | 0.0064  | 3.1433 | 3.8441 |
| RE14 | 3.7572 | 0.0012 | 0.0674 | 1.0002 | 3.7567 | 3.6258 | 3.8882 | 0.0006  | -0.0747 | 3.4733 | 4.0620 |
| RE13 | 3.5761 | 0.0018 | 0.0869 | 1.0002 | 3.5758 | 3.4088 | 3.7472 | 0.0323  | -0.0904 | 3.2333 | 3.9107 |
| RE6  | 3.6617 | 0.0015 | 0.0747 | 1.0002 | 3.6620 | 3.5162 | 3.8087 | 0.0191  | -0.0192 | 3.3916 | 3.9452 |
| WI1  | 3.3656 | 0.0016 | 0.0760 | 1.0002 | 3.3664 | 3.2146 | 3.5128 | -0.0617 | -0.0616 | 3.0455 | 3.6422 |
| WI2  | 2.6800 | 0.0018 | 0.0999 | 1.0002 | 2.6804 | 2.4840 | 2.8767 | 0.0081  | -0.0218 | 2.2954 | 3.0759 |

|                                             |        |        |        |        |        |        |        |         |         |        |        |
|---------------------------------------------|--------|--------|--------|--------|--------|--------|--------|---------|---------|--------|--------|
| WI3                                         | 2.6666 | 0.0022 | 0.0996 | 1.0002 | 2.6662 | 2.4727 | 2.8615 | -0.0049 | -0.0113 | 2.2083 | 3.0446 |
| WI4                                         | 3.0755 | 0.0016 | 0.0877 | 1.0002 | 3.0755 | 2.9057 | 3.2469 | -0.0099 | -0.0562 | 2.6963 | 3.3998 |
| WI5                                         | 3.6779 | 0.0015 | 0.0744 | 1.0002 | 3.6786 | 3.5318 | 3.8221 | -0.0323 | 0.0357  | 3.3396 | 3.9742 |
|                                             |        |        |        |        |        |        |        |         |         |        |        |
| Covariances                                 |        |        |        |        |        |        |        |         |         |        |        |
|                                             |        |        |        |        |        |        |        |         |         |        |        |
| Career_development<->Recruitment_selection  | 0.6502 | 0.0020 | 0.0957 | 1.0002 | 0.6461 | 0.4721 | 0.8497 | 0.2324  | 0.1022  | 0.3226 | 1.0868 |
| Recognition_value<->Participation_research  | 1.3629 | 0.0032 | 0.1344 | 1.0003 | 1.3565 | 1.1154 | 1.6432 | 0.2336  | -0.0078 | 0.9001 | 2.0188 |
| Work_incentives<->Recognition_value         | 1.2098 | 0.0026 | 0.1204 | 1.0002 | 1.2037 | 0.9906 | 1.4615 | 0.2710  | 0.1270  | 0.7878 | 1.7952 |
| Career_development<->Participation_research | 0.9874 | 0.0025 | 0.1024 | 1.0003 | 0.9824 | 0.8025 | 1.2047 | 0.3287  | 0.1539  | 0.5630 | 1.4371 |
| Career_development<->Recognition_value      | 0.7496 | 0.0017 | 0.0797 | 1.0002 | 0.7462 | 0.6044 | 0.9171 | 0.2928  | 0.1980  | 0.4295 | 1.1371 |
| Work_incentives<->Career_development        | 0.9675 | 0.0021 | 0.0969 | 1.0002 | 0.9619 | 0.7911 | 1.1728 | 0.2816  | 0.0928  | 0.5587 | 1.3862 |
| Work_incentives<->Recruitment_selection     | 0.8485 | 0.0027 | 0.1319 | 1.0002 | 0.8445 | 0.6028 | 1.1217 | 0.2113  | 0.0964  | 0.4003 | 1.4560 |
| Work_incentives<->Participation_research    | 1.4761 | 0.0037 | 0.1495 | 1.0003 | 1.4696 | 1.2030 | 1.7850 | 0.2566  | 0.0181  | 0.9705 | 2.1737 |
| Recruitment_selection<->Recognition_value   | 0.8232 | 0.0022 | 0.1143 | 1.0002 | 0.8184 | 0.6136 | 1.0624 | 0.2569  | 0.1823  | 0.3831 | 1.3741 |
| Career_development<->Job_payment            | 1.2936 | 0.0029 | 0.1277 | 1.0003 | 1.2887 | 1.0553 | 1.5605 | 0.2330  | 0.1330  | 0.8250 | 1.9221 |
| Job_payment<->Recognition_value             | 0.8936 | 0.0026 | 0.1302 | 1.0002 | 0.8889 | 0.6495 | 1.1600 | 0.1516  | 0.0412  | 0.3484 | 1.4405 |
| Job_payment<->Participation_research        | 1.4188 | 0.0036 | 0.1651 | 1.0002 | 1.4117 | 1.1127 | 1.7619 | 0.2364  | 0.1724  | 0.8427 | 2.2743 |
| Work_incentives<->Job_payment               | 1.4017 | 0.0037 | 0.1633 | 1.0002 | 1.3977 | 1.0946 | 1.7333 | 0.1319  | 0.0029  | 0.7017 | 2.0485 |

|                                                |        |        |        |        |        |        |        |         |         |        |        |
|------------------------------------------------|--------|--------|--------|--------|--------|--------|--------|---------|---------|--------|--------|
| Job_payment<->Recruitment_selection            | 0.9572 | 0.0038 | 0.1787 | 1.0002 | 0.9537 | 0.6193 | 1.3211 | 0.1423  | 0.0619  | 0.2560 | 1.6597 |
| Recruitment_selection<->Participation_research | 0.9451 | 0.0030 | 0.1356 | 1.0002 | 0.9395 | 0.6941 | 1.2252 | 0.2418  | 0.1523  | 0.4625 | 1.5540 |
|                                                |        |        |        |        |        |        |        |         |         |        |        |
| Variances                                      |        |        |        |        |        |        |        |         |         |        |        |
|                                                |        |        |        |        |        |        |        |         |         |        |        |
| Career_development                             | 1.0788 | 0.0027 | 0.1163 | 1.0003 | 1.0726 | 0.8679 | 1.3254 | 0.3359  | 0.3432  | 0.6429 | 1.7150 |
| Job_payment                                    | 4.1589 | 0.0078 | 0.3544 | 1.0002 | 4.1469 | 3.4938 | 4.8859 | 0.1942  | 0.0206  | 2.9506 | 5.6326 |
| Recruitment_selection                          | 2.8509 | 0.0070 | 0.3201 | 1.0002 | 2.8439 | 2.2503 | 3.5026 | 0.1475  | 0.0217  | 1.5193 | 4.2099 |
| Recognition_value                              | 1.5177 | 0.0035 | 0.1558 | 1.0002 | 1.5118 | 1.2311 | 1.8390 | 0.2366  | 0.1595  | 0.9874 | 2.2851 |
| Participation_research                         | 2.0496 | 0.0059 | 0.2341 | 1.0003 | 2.0396 | 1.6235 | 2.5441 | 0.3160  | 0.2373  | 1.3262 | 3.1217 |
| Work_incentives                                | 1.9557 | 0.0048 | 0.1939 | 1.0003 | 1.9478 | 1.5937 | 2.3524 | 0.2041  | -0.0250 | 1.3347 | 2.8371 |
| e1                                             | 1.0281 | 0.0014 | 0.0667 | 1.0002 | 1.0252 | 0.9057 | 1.1679 | 0.2549  | 0.0552  | 0.7971 | 1.3078 |
| e2                                             | 1.4878 | 0.0019 | 0.0949 | 1.0002 | 1.4833 | 1.3144 | 1.6880 | 0.2704  | 0.0608  | 1.1824 | 1.9094 |
| e3                                             | 1.3794 | 0.0018 | 0.0878 | 1.0002 | 1.3752 | 1.2150 | 1.5615 | 0.2413  | 0.1005  | 1.0802 | 1.8062 |
| e4                                             | 1.0237 | 0.0014 | 0.0682 | 1.0002 | 1.0214 | 0.8975 | 1.1654 | 0.2266  | 0.0860  | 0.7885 | 1.3139 |
| e5                                             | 1.2321 | 0.0015 | 0.0826 | 1.0002 | 1.2298 | 1.0764 | 1.4019 | 0.1907  | 0.0731  | 0.9344 | 1.6220 |
| e6                                             | 2.1720 | 0.0032 | 0.1408 | 1.0003 | 2.1652 | 1.9149 | 2.4641 | 0.2774  | 0.2234  | 1.6918 | 2.8457 |
| e7                                             | 1.3421 | 0.0021 | 0.0926 | 1.0002 | 1.3398 | 1.1691 | 1.5306 | 0.1960  | 0.0907  | 1.0063 | 1.8384 |
| e8                                             | 1.1575 | 0.0015 | 0.0774 | 1.0002 | 1.1538 | 1.0145 | 1.3188 | 0.2660  | 0.2170  | 0.8657 | 1.5694 |
| e9                                             | 1.6531 | 0.0023 | 0.1106 | 1.0002 | 1.6500 | 1.4463 | 1.8795 | 0.2032  | 0.1770  | 1.2495 | 2.2365 |
| e10                                            | 1.3465 | 0.0020 | 0.0927 | 1.0002 | 1.3413 | 1.1781 | 1.5397 | 0.2825  | 0.1625  | 1.0199 | 1.7983 |
| e11                                            | 1.1048 | 0.0014 | 0.0713 | 1.0002 | 1.1017 | 0.9740 | 1.2537 | 0.2485  | 0.0878  | 0.8509 | 1.4255 |
| e12                                            | 1.6262 | 0.0022 | 0.1018 | 1.0002 | 1.6219 | 1.4365 | 1.8363 | 0.1998  | 0.0357  | 1.2369 | 2.0619 |
| e13                                            | 2.0065 | 0.0028 | 0.1299 | 1.0002 | 2.0006 | 1.7690 | 2.2740 | 0.3071  | 0.3283  | 1.5717 | 2.7056 |
| e14                                            | 0.7535 | 0.0049 | 0.2031 | 1.0003 | 0.7569 | 0.3375 | 1.1382 | -0.1161 | 0.0832  | 0.0023 | 1.5492 |

|     |        |        |        |        |        |        |        |        |         |        |        |
|-----|--------|--------|--------|--------|--------|--------|--------|--------|---------|--------|--------|
| e15 | 1.5862 | 0.0042 | 0.1812 | 1.0003 | 1.5850 | 1.2395 | 1.9506 | 0.0967 | 0.0352  | 0.8387 | 2.3465 |
| e16 | 2.8126 | 0.0048 | 0.2033 | 1.0003 | 2.8057 | 2.4335 | 3.2321 | 0.2483 | 0.1719  | 2.0555 | 3.6889 |
| e17 | 1.8996 | 0.0044 | 0.1861 | 1.0003 | 1.8922 | 1.5477 | 2.2863 | 0.2150 | 0.2823  | 1.1869 | 2.8941 |
| e18 | 1.7470 | 0.0041 | 0.1690 | 1.0003 | 1.7385 | 1.4386 | 2.0931 | 0.2304 | 0.0349  | 1.1419 | 2.6006 |
| e19 | 2.0579 | 0.0046 | 0.1918 | 1.0003 | 2.0506 | 1.7035 | 2.4601 | 0.2936 | 0.3188  | 1.3942 | 2.9744 |
| e20 | 1.2247 | 0.0018 | 0.0830 | 1.0002 | 1.2214 | 1.0681 | 1.3939 | 0.1744 | 0.0350  | 0.9461 | 1.6066 |
| e21 | 2.2152 | 0.0031 | 0.1423 | 1.0002 | 2.2092 | 1.9512 | 2.5114 | 0.2433 | 0.0988  | 1.7375 | 2.8534 |
| e22 | 1.3229 | 0.0019 | 0.0907 | 1.0002 | 1.3186 | 1.1547 | 1.5143 | 0.2671 | 0.1788  | 0.9988 | 1.7448 |
| e23 | 1.2165 | 0.0016 | 0.0830 | 1.0002 | 1.2133 | 1.0618 | 1.3877 | 0.1909 | 0.0070  | 0.8728 | 1.5572 |
| e24 | 1.1004 | 0.0019 | 0.0771 | 1.0003 | 1.0971 | 0.9582 | 1.2616 | 0.2618 | 0.1099  | 0.8557 | 1.4598 |
| e25 | 1.5265 | 0.0019 | 0.0999 | 1.0002 | 1.5223 | 1.3446 | 1.7314 | 0.2530 | 0.0216  | 1.1949 | 2.0434 |
| e26 | 1.2875 | 0.0019 | 0.0859 | 1.0002 | 1.2852 | 1.1267 | 1.4634 | 0.1864 | 0.0122  | 0.9691 | 1.6612 |
| e27 | 1.9797 | 0.0028 | 0.1290 | 1.0002 | 1.9732 | 1.7453 | 2.2542 | 0.2977 | 0.1879  | 1.5359 | 2.6112 |
| e28 | 1.0440 | 0.0016 | 0.0744 | 1.0002 | 1.0406 | 0.9064 | 1.2002 | 0.3039 | 0.2705  | 0.7816 | 1.4095 |
| e29 | 1.5675 | 0.0019 | 0.1007 | 1.0002 | 1.5636 | 1.3826 | 1.7746 | 0.2075 | -0.0001 | 1.1991 | 1.9971 |
| e30 | 2.1960 | 0.0027 | 0.1450 | 1.0002 | 2.1896 | 1.9276 | 2.4982 | 0.2271 | 0.0021  | 1.6669 | 2.7778 |
| e31 | 1.8428 | 0.0028 | 0.1221 | 1.0003 | 1.8380 | 1.6167 | 2.0954 | 0.2029 | 0.0537  | 1.3983 | 2.4843 |
| e32 | 2.0541 | 0.0030 | 0.1365 | 1.0002 | 2.0473 | 1.8074 | 2.3413 | 0.2691 | 0.0332  | 1.5743 | 2.7145 |
| e33 | 1.5559 | 0.0023 | 0.1104 | 1.0002 | 1.5526 | 1.3495 | 1.7797 | 0.1587 | 0.0259  | 1.1247 | 2.0123 |
| e34 | 1.0535 | 0.0014 | 0.0722 | 1.0002 | 1.0512 | 0.9190 | 1.2012 | 0.1772 | -0.0217 | 0.8007 | 1.3604 |
| e35 | 1.6261 | 0.0022 | 0.1156 | 1.0002 | 1.6230 | 1.4081 | 1.8631 | 0.1845 | 0.0727  | 1.1906 | 2.1712 |
| e36 | 1.2204 | 0.0017 | 0.0862 | 1.0002 | 1.2171 | 1.0613 | 1.3984 | 0.2372 | 0.0876  | 0.9344 | 1.6479 |
| e37 | 1.2939 | 0.0026 | 0.1016 | 1.0003 | 1.2898 | 1.1054 | 1.5041 | 0.2371 | 0.0809  | 0.9437 | 1.7079 |
| e38 | 2.7275 | 0.0043 | 0.1986 | 1.0002 | 2.7188 | 2.3608 | 3.1409 | 0.2281 | 0.0650  | 2.0348 | 3.6176 |
| e39 | 2.3652 | 0.0044 | 0.1823 | 1.0003 | 2.3577 | 2.0298 | 2.7404 | 0.2119 | -0.0625 | 1.7496 | 3.1997 |
| e40 | 1.7063 | 0.0027 | 0.1311 | 1.0002 | 1.7012 | 1.4633 | 1.9761 | 0.2160 | 0.0641  | 1.2427 | 2.2934 |
| e41 | 1.4427 | 0.0022 | 0.1056 | 1.0002 | 1.4391 | 1.2482 | 1.6612 | 0.2530 | 0.1684  | 1.0334 | 1.9517 |

Table S2. Comparison of Regression Weights Unstandardized Parameter Estimates – Maximum Likelihood versus Bayesian in Model 2

| Parameter                   | Bayesian | ML    |
|-----------------------------|----------|-------|
| MANAG4<--Career_development | 0.9571   | .936  |
| MANAG3<--Career_development | 1.0381   | 1.017 |
| MANAG2<--Career_development | 1.1238   | 1.098 |
| MANAG1<--Career_development | 1.3152   | 1.261 |
| CD8<--Career_development    | 1.2578   | 1.127 |
| CD7<--Career_development    | 1.4823   | 1.344 |
| CD6<--Career_development    | 1.3688   | 1.326 |
| CD5<--Career_development    | 1.4463   | 1.353 |
| CD4<--Career_development    | 1.4569   | 1.387 |
| CD3<--Career_development    | 0.9448   | .887  |
| CD2<--Career_development    | 1.0985   | 1.136 |
| CD1<--Career_development    | 1.0429   | 1.139 |
| SAL1<--Job_payment          | 0.8779   | .952  |
| RS2<--Recruitment_selection | 1.3654   | 1.391 |
| RS3<--Recruitment_selection | 1.3565   | 1.298 |
| RS4<--Recruitment_selection | 1.4026   | 1.309 |
| RE4<--Recognition_value     | 1.1244   | 1.047 |
| RE5<--Recognition_value     | 1.1583   | 1.046 |
| RE7<--Recognition_value     | 1.0297   | 1.017 |
| RE8<--Recognition_value     | 1.0980   | .977  |
| RE9<--Recognition_value     | 0.9635   | .901  |
| RE10<--Recognition_value    | 1.0517   | .985  |



|                               |        |       |
|-------------------------------|--------|-------|
| RE11<--Recognition_value      | 1.1253 | 1.034 |
| RE12<--Recognition_value      | 1.1978 | 1.116 |
| RE17<--Recognition_value      | 0.9610 | .880  |
| RE19<--Participation_research | 0.9433 | 1.047 |
| RE18<--Participation_research | 1.0101 | 1.046 |
| RE15<--Participation_research | 1.0835 | 1.017 |
| RE14<--Participation_research | 0.8382 | .977  |
| RE13<--Participation_research | 1.1364 | .901  |
| RE6<--Participation_research  | 0.9763 | .985  |
| WI2<--Work_incentives         | 1.2241 | 1.170 |
| WI3<--Work_incentives         | 1.2851 | 1.300 |
| WI4<--Work_incentives         | 1.1779 | 1.242 |
| WI5<--Work_incentives         | 0.9240 | .896  |
