# Supplementary material
Source: MDPI journal article supplement (https://www.mdpi.com/2071-1050/14/4/2254)
Supplement: s1 [file s1]

Table S3. Model 3 B-SEM Estimates and statistics

|                                 | Mean  | S.E.  | S.D.  | C.S.  | Median | 95%<br>Lower<br>bound | 95%<br>Upper<br>bound | Skewness | Kurtosis | Min   | Max   | Name |
|---------------------------------|-------|-------|-------|-------|--------|-----------------------|-----------------------|----------|----------|-------|-------|------|
| <b>Regression weights</b>       |       |       |       |       |        |                       |                       |          |          |       |       |      |
| MANAG4<--Career_development     | 0.965 | 0.002 | 0.069 | 1.000 | 0.964  | 0.832                 | 1.101                 | 0.070    | -0.085   | 0.705 | 1.236 |      |
| MANAG3<--Career_development     | 1.051 | 0.002 | 0.069 | 1.000 | 1.048  | 0.919                 | 1.194                 | 0.225    | 0.231    | 0.818 | 1.361 |      |
| MANAG2<--Career_development     | 1.142 | 0.002 | 0.067 | 1.000 | 1.140  | 1.017                 | 1.281                 | 0.198    | 0.133    | 0.894 | 1.416 |      |
| MANAG1<--Career_development     | 1.327 | 0.002 | 0.075 | 1.000 | 1.325  | 1.187                 | 1.481                 | 0.195    | 0.013    | 1.056 | 1.634 |      |
| CD8<--Career_development        | 1.273 | 0.003 | 0.087 | 1.001 | 1.270  | 1.109                 | 1.451                 | 0.194    | 0.016    | 0.981 | 1.699 |      |
| CD7<--Career_development        | 1.500 | 0.003 | 0.086 | 1.001 | 1.496  | 1.339                 | 1.679                 | 0.207    | -0.004   | 1.158 | 1.885 |      |
| CD6<--Career_development        | 1.384 | 0.003 | 0.079 | 1.001 | 1.380  | 1.240                 | 1.550                 | 0.295    | 0.176    | 1.113 | 1.805 |      |
| CD5<--Career_development        | 1.458 | 0.003 | 0.087 | 1.000 | 1.456  | 1.297                 | 1.639                 | 0.225    | 0.260    | 1.169 | 1.927 |      |
| CD4<--Career_development        | 1.469 | 0.003 | 0.084 | 1.001 | 1.466  | 1.313                 | 1.639                 | 0.180    | 0.081    | 1.162 | 1.820 |      |
| CD3<--Career_development        | 0.958 | 0.002 | 0.063 | 1.000 | 0.955  | 0.843                 | 1.089                 | 0.289    | 0.269    | 0.761 | 1.251 |      |
| CD2<--Career_development        | 1.108 | 0.002 | 0.075 | 1.000 | 1.105  | 0.969                 | 1.261                 | 0.240    | 0.165    | 0.840 | 1.425 |      |
| CD1<--Career_development        | 1.048 | 0.002 | 0.077 | 1.000 | 1.045  | 0.906                 | 1.208                 | 0.237    | 0.078    | 0.788 | 1.383 |      |
| RS2<--Recruitment_and_selection | 1.378 | 0.002 | 0.072 | 1.000 | 1.376  | 1.246                 | 1.527                 | 0.226    | 0.129    | 1.105 | 1.729 |      |
| RS3<--Recruitment_and_selection | 1.372 | 0.002 | 0.078 | 1.000 | 1.369  | 1.230                 | 1.537                 | 0.289    | 0.253    | 1.095 | 1.769 |      |
| RS4<--Recruitment_and_selection | 1.416 | 0.003 | 0.082 | 1.000 | 1.414  | 1.262                 | 1.585                 | 0.202    | 0.126    | 1.132 | 1.758 |      |
| RE4<--Recognition_and_value     | 1.143 | 0.002 | 0.072 | 1.000 | 1.142  | 1.008                 | 1.290                 | 0.152    | 0.056    | 0.842 | 1.494 |      |
| RE5<--Recognition_and_value     | 1.180 | 0.002 | 0.065 | 1.000 | 1.177  | 1.059                 | 1.315                 | 0.229    | 0.080    | 0.954 | 1.448 |      |
| RE7<--Recognition_and_value     | 1.037 | 0.001 | 0.059 | 1.000 | 1.036  | 0.927                 | 1.158                 | 0.142    | -0.028   | 0.830 | 1.265 |      |
| RE8<--Recognition_and_value     | 1.116 | 0.002 | 0.062 | 1.000 | 1.115  | 0.999                 | 1.243                 | 0.149    | 0.015    | 0.889 | 1.391 |      |
| RE9<--Recognition_and_value     | 0.979 | 0.002 | 0.062 | 1.000 | 0.977  | 0.861                 | 1.104                 | 0.163    | 0.103    | 0.768 | 1.240 |      |
| RE10<--Recognition_and_value    | 1.063 | 0.002 | 0.059 | 1.000 | 1.062  | 0.951                 | 1.183                 | 0.153    | 0.180    | 0.843 | 1.339 |      |

[illegible]

|        |       |       |       |       |       |       |       |        |        |       |       |  |
|--------|-------|-------|-------|-------|-------|-------|-------|--------|--------|-------|-------|--|
| MANAG5 | 4.032 | 0.002 | 0.062 | 1.000 | 4.031 | 3.913 | 4.155 | 0.047  | -0.067 | 3.786 | 4.253 |  |
| MANAG4 | 3.931 | 0.002 | 0.067 | 1.000 | 3.931 | 3.798 | 4.061 | -0.007 | 0.088  | 3.686 | 4.207 |  |
| MANAG3 | 3.957 | 0.002 | 0.067 | 1.000 | 3.956 | 3.826 | 4.090 | 0.020  | 0.004  | 3.714 | 4.234 |  |
| MANAG2 | 3.781 | 0.002 | 0.066 | 1.000 | 3.780 | 3.655 | 3.912 | 0.065  | -0.051 | 3.529 | 4.027 |  |
| MANAG1 | 2.963 | 0.002 | 0.074 | 1.000 | 2.962 | 2.820 | 3.110 | 0.056  | -0.024 | 2.656 | 3.256 |  |
| CD8    | 2.852 | 0.002 | 0.084 | 1.000 | 2.852 | 2.688 | 3.019 | 0.033  | -0.042 | 2.523 | 3.143 |  |
| CD7    | 3.020 | 0.002 | 0.082 | 1.000 | 3.020 | 2.859 | 3.180 | -0.009 | -0.010 | 2.703 | 3.361 |  |
| CD6    | 3.374 | 0.002 | 0.076 | 1.000 | 3.374 | 3.229 | 3.521 | 0.044  | -0.109 | 3.086 | 3.694 |  |
| CD5    | 2.563 | 0.002 | 0.083 | 1.000 | 2.563 | 2.402 | 2.726 | 0.021  | -0.134 | 2.245 | 2.862 |  |
| CD4    | 3.147 | 0.002 | 0.080 | 1.000 | 3.146 | 2.991 | 3.305 | 0.058  | -0.023 | 2.865 | 3.525 |  |
| CD3    | 4.022 | 0.002 | 0.061 | 1.000 | 4.022 | 3.905 | 4.142 | -0.006 | -0.106 | 3.767 | 4.303 |  |
| CD2    | 3.775 | 0.002 | 0.073 | 1.000 | 3.775 | 3.630 | 3.916 | -0.032 | -0.062 | 3.516 | 4.066 |  |
| CD1    | 3.974 | 0.002 | 0.077 | 1.000 | 3.974 | 3.824 | 4.123 | 0.022  | -0.145 | 3.712 | 4.285 |  |
| RS1    | 2.064 | 0.003 | 0.102 | 1.000 | 2.065 | 1.863 | 2.257 | -0.053 | 0.038  | 1.614 | 2.506 |  |
| RS2    | 2.482 | 0.003 | 0.115 | 1.000 | 2.481 | 2.256 | 2.711 | 0.021  | 0.115  | 1.986 | 2.956 |  |
| RS3    | 2.658 | 0.003 | 0.113 | 1.000 | 2.658 | 2.436 | 2.880 | 0.009  | 0.027  | 2.213 | 3.117 |  |
| RS4    | 2.921 | 0.003 | 0.118 | 1.000 | 2.922 | 2.690 | 3.151 | 0.010  | -0.069 | 2.441 | 3.361 |  |
| RE3    | 3.929 | 0.002 | 0.070 | 1.000 | 3.929 | 3.792 | 4.069 | 0.004  | 0.104  | 3.645 | 4.177 |  |
| RE4    | 2.501 | 0.002 | 0.087 | 1.000 | 2.500 | 2.329 | 2.670 | -0.027 | 0.042  | 2.162 | 2.831 |  |
| RE5    | 3.004 | 0.002 | 0.077 | 1.000 | 3.004 | 2.855 | 3.157 | 0.047  | -0.028 | 2.721 | 3.314 |  |
| RE7    | 3.539 | 0.002 | 0.072 | 1.000 | 3.538 | 3.399 | 3.683 | 0.044  | 0.111  | 3.248 | 3.814 |  |
| RE8    | 3.116 | 0.002 | 0.073 | 1.000 | 3.116 | 2.974 | 3.261 | 0.028  | 0.073  | 2.826 | 3.424 |  |
| RE9    | 2.995 | 0.002 | 0.074 | 1.000 | 2.994 | 2.852 | 3.140 | -0.010 | 0.124  | 2.694 | 3.304 |  |
| RE10   | 3.757 | 0.002 | 0.073 | 1.000 | 3.755 | 3.616 | 3.903 | 0.078  | 0.052  | 3.460 | 4.060 |  |
| RE11   | 2.632 | 0.002 | 0.083 | 1.000 | 2.632 | 2.470 | 2.793 | -0.030 | -0.043 | 2.309 | 2.944 |  |
| RE12   | 3.001 | 0.002 | 0.077 | 1.000 | 3.001 | 2.853 | 3.154 | 0.032  | -0.006 | 2.675 | 3.326 |  |
| RE17   | 2.833 | 0.002 | 0.072 | 1.000 | 2.832 | 2.690 | 2.975 | 0.013  | 0.006  | 2.502 | 3.111 |  |

|                      |       |       |       |       |       |       |       |        |        |       |       |  |
|----------------------|-------|-------|-------|-------|-------|-------|-------|--------|--------|-------|-------|--|
| RE20                 | 3.056 | 0.002 | 0.087 | 1.000 | 3.056 | 2.884 | 3.227 | 0.016  | 0.056  | 2.750 | 3.422 |  |
| RE19                 | 3.334 | 0.002 | 0.081 | 1.000 | 3.334 | 3.175 | 3.491 | -0.008 | 0.012  | 3.018 | 3.680 |  |
| RE18                 | 3.099 | 0.002 | 0.085 | 1.000 | 3.099 | 2.935 | 3.268 | 0.012  | 0.059  | 2.757 | 3.419 |  |
| RE15                 | 3.484 | 0.002 | 0.083 | 1.000 | 3.484 | 3.322 | 3.644 | -0.032 | 0.010  | 3.145 | 3.816 |  |
| RE14                 | 3.757 | 0.002 | 0.067 | 1.000 | 3.756 | 3.624 | 3.891 | 0.053  | 0.090  | 3.512 | 4.080 |  |
| RE13                 | 3.576 | 0.002 | 0.087 | 1.000 | 3.575 | 3.408 | 3.752 | 0.096  | 0.075  | 3.223 | 3.923 |  |
| RE6                  | 3.662 | 0.002 | 0.075 | 1.000 | 3.662 | 3.515 | 3.809 | 0.025  | -0.058 | 3.385 | 3.937 |  |
| SAL1                 | 3.780 | 0.002 | 0.092 | 1.000 | 3.780 | 3.598 | 3.958 | -0.021 | 0.037  | 3.412 | 4.129 |  |
| SAL2                 | 3.247 | 0.002 | 0.092 | 1.000 | 3.247 | 3.067 | 3.428 | 0.011  | -0.016 | 2.889 | 3.600 |  |
| WI1                  | 3.367 | 0.002 | 0.076 | 1.000 | 3.367 | 3.215 | 3.514 | -0.050 | 0.054  | 3.056 | 3.668 |  |
| WI2                  | 2.679 | 0.003 | 0.102 | 1.000 | 2.679 | 2.481 | 2.879 | 0.049  | -0.089 | 2.314 | 3.105 |  |
| WI3                  | 2.666 | 0.003 | 0.101 | 1.000 | 2.666 | 2.469 | 2.865 | 0.014  | -0.088 | 2.199 | 3.082 |  |
| WI4                  | 3.079 | 0.002 | 0.090 | 1.000 | 3.079 | 2.902 | 3.255 | -0.016 | 0.063  | 2.714 | 3.448 |  |
| WI5                  | 3.679 | 0.002 | 0.074 | 1.000 | 3.680 | 3.536 | 3.826 | 0.001  | 0.028  | 3.382 | 3.988 |  |
|                      |       |       |       |       |       |       |       |        |        |       |       |  |
| <b>Covariances</b>   |       |       |       |       |       |       |       |        |        |       |       |  |
|                      |       |       |       |       |       |       |       |        |        |       |       |  |
| e57<->e58            | 1.420 | 0.005 | 0.171 | 1.000 | 1.415 | 1.096 | 1.767 | 0.155  | 0.078  | 0.747 | 2.259 |  |
|                      |       |       |       |       |       |       |       |        |        |       |       |  |
| <b>Variances</b>     |       |       |       |       |       |       |       |        |        |       |       |  |
|                      |       |       |       |       |       |       |       |        |        |       |       |  |
| Research_performance | 1.546 | 0.004 | 0.143 | 1.000 | 1.540 | 1.283 | 1.848 | 0.287  | 0.189  | 1.013 | 2.304 |  |
| e42                  | 2.170 | 0.006 | 0.241 | 1.000 | 2.159 | 1.722 | 2.667 | 0.198  | -0.005 | 1.255 | 3.046 |  |
| e47                  | 0.422 | 0.001 | 0.051 | 1.000 | 0.420 | 0.329 | 0.531 | 0.291  | 0.053  | 0.243 | 0.633 |  |
| e53                  | 0.482 | 0.002 | 0.057 | 1.000 | 0.479 | 0.376 | 0.601 | 0.268  | 0.189  | 0.301 | 0.731 |  |
| e61                  | 2.226 | 0.008 | 0.236 | 1.001 | 2.215 | 1.795 | 2.728 | 0.319  | 0.189  | 1.477 | 3.284 |  |
| e62                  | 0.489 | 0.002 | 0.073 | 1.000 | 0.486 | 0.355 | 0.638 | 0.205  | -0.016 | 0.248 | 0.852 |  |

|     |       |       |       |       |       |       |       |       |        |       |       |  |
|-----|-------|-------|-------|-------|-------|-------|-------|-------|--------|-------|-------|--|
| e63 | 0.405 | 0.002 | 0.069 | 1.000 | 0.402 | 0.281 | 0.547 | 0.301 | 0.057  | 0.184 | 0.724 |  |
| e1  | 1.027 | 0.002 | 0.068 | 1.000 | 1.024 | 0.903 | 1.170 | 0.265 | 0.060  | 0.800 | 1.332 |  |
| e2  | 1.485 | 0.003 | 0.097 | 1.000 | 1.480 | 1.309 | 1.687 | 0.290 | 0.069  | 1.174 | 1.957 |  |
| e3  | 1.378 | 0.003 | 0.089 | 1.000 | 1.373 | 1.215 | 1.565 | 0.272 | 0.118  | 1.072 | 1.743 |  |
| e4  | 1.016 | 0.002 | 0.069 | 1.000 | 1.014 | 0.890 | 1.161 | 0.234 | 0.010  | 0.770 | 1.309 |  |
| e5  | 1.226 | 0.002 | 0.081 | 1.000 | 1.223 | 1.076 | 1.395 | 0.229 | 0.059  | 0.930 | 1.561 |  |
| e6  | 2.171 | 0.004 | 0.137 | 1.000 | 2.165 | 1.916 | 2.453 | 0.207 | -0.007 | 1.667 | 2.713 |  |
| e7  | 1.336 | 0.002 | 0.092 | 1.000 | 1.332 | 1.166 | 1.526 | 0.217 | -0.001 | 1.045 | 1.703 |  |
| e8  | 1.159 | 0.002 | 0.078 | 1.000 | 1.157 | 1.014 | 1.322 | 0.215 | 0.059  | 0.896 | 1.498 |  |
| e9  | 1.662 | 0.003 | 0.109 | 1.000 | 1.657 | 1.461 | 1.888 | 0.279 | 0.232  | 1.288 | 2.197 |  |
| e10 | 1.356 | 0.002 | 0.091 | 1.000 | 1.354 | 1.184 | 1.542 | 0.150 | -0.007 | 1.018 | 1.712 |  |
| e11 | 1.099 | 0.002 | 0.071 | 1.000 | 1.095 | 0.969 | 1.246 | 0.289 | 0.230  | 0.870 | 1.417 |  |
| e12 | 1.639 | 0.003 | 0.105 | 1.000 | 1.635 | 1.446 | 1.854 | 0.207 | -0.116 | 1.299 | 2.043 |  |
| e13 | 2.030 | 0.003 | 0.128 | 1.000 | 2.024 | 1.793 | 2.290 | 0.241 | 0.120  | 1.608 | 2.669 |  |
| e16 | 2.840 | 0.007 | 0.204 | 1.001 | 2.830 | 2.457 | 3.263 | 0.220 | 0.046  | 2.144 | 3.870 |  |
| e17 | 1.913 | 0.005 | 0.182 | 1.000 | 1.912 | 1.566 | 2.278 | 0.163 | 0.175  | 1.272 | 2.716 |  |
| e18 | 1.738 | 0.005 | 0.172 | 1.000 | 1.732 | 1.420 | 2.097 | 0.251 | 0.241  | 1.109 | 2.585 |  |
| e19 | 2.053 | 0.006 | 0.193 | 1.001 | 2.048 | 1.692 | 2.447 | 0.270 | 0.544  | 1.299 | 3.187 |  |
| e20 | 1.247 | 0.002 | 0.083 | 1.000 | 1.245 | 1.094 | 1.417 | 0.189 | 0.040  | 0.965 | 1.641 |  |
| e21 | 2.206 | 0.004 | 0.144 | 1.000 | 2.199 | 1.938 | 2.501 | 0.213 | 0.046  | 1.720 | 2.823 |  |
| e22 | 1.302 | 0.002 | 0.091 | 1.000 | 1.299 | 1.132 | 1.483 | 0.175 | 0.000  | 0.984 | 1.688 |  |
| e23 | 1.235 | 0.002 | 0.083 | 1.000 | 1.232 | 1.082 | 1.404 | 0.231 | 0.058  | 0.957 | 1.612 |  |
| e24 | 1.085 | 0.002 | 0.077 | 1.000 | 1.081 | 0.945 | 1.247 | 0.280 | 0.155  | 0.845 | 1.461 |  |
| e25 | 1.520 | 0.002 | 0.099 | 1.000 | 1.516 | 1.343 | 1.732 | 0.361 | 0.313  | 1.193 | 1.989 |  |
| e26 | 1.300 | 0.002 | 0.088 | 1.000 | 1.298 | 1.139 | 1.482 | 0.196 | 0.024  | 0.960 | 1.678 |  |
| e27 | 1.975 | 0.004 | 0.132 | 1.000 | 1.968 | 1.734 | 2.251 | 0.267 | 0.074  | 1.537 | 2.521 |  |
| e28 | 1.030 | 0.002 | 0.074 | 1.000 | 1.027 | 0.892 | 1.183 | 0.234 | 0.115  | 0.763 | 1.353 |  |

|     |       |       |       |       |       |       |       |        |        |       |       |  |
|-----|-------|-------|-------|-------|-------|-------|-------|--------|--------|-------|-------|--|
| e29 | 1.565 | 0.003 | 0.102 | 1.000 | 1.562 | 1.374 | 1.775 | 0.219  | 0.124  | 1.221 | 2.016 |  |
| e30 | 2.209 | 0.004 | 0.147 | 1.000 | 2.202 | 1.936 | 2.513 | 0.223  | 0.038  | 1.736 | 2.826 |  |
| e31 | 1.862 | 0.003 | 0.123 | 1.000 | 1.860 | 1.628 | 2.111 | 0.116  | -0.040 | 1.445 | 2.362 |  |
| e32 | 2.051 | 0.004 | 0.138 | 1.000 | 2.045 | 1.796 | 2.330 | 0.201  | -0.070 | 1.567 | 2.616 |  |
| e33 | 1.543 | 0.003 | 0.113 | 1.000 | 1.538 | 1.335 | 1.777 | 0.240  | 0.087  | 1.139 | 2.015 |  |
| e34 | 1.049 | 0.002 | 0.073 | 1.000 | 1.047 | 0.912 | 1.201 | 0.169  | -0.006 | 0.794 | 1.334 |  |
| e35 | 1.618 | 0.003 | 0.117 | 1.000 | 1.614 | 1.401 | 1.857 | 0.212  | 0.118  | 1.159 | 2.128 |  |
| e36 | 1.219 | 0.002 | 0.085 | 1.000 | 1.216 | 1.060 | 1.395 | 0.230  | 0.108  | 0.952 | 1.561 |  |
| e54 | 1.357 | 0.006 | 0.210 | 1.000 | 1.353 | 0.952 | 1.780 | 0.070  | 0.114  | 0.523 | 2.128 |  |
| e55 | 1.027 | 0.006 | 0.223 | 1.000 | 1.033 | 0.574 | 1.452 | -0.158 | 0.127  | 0.030 | 1.886 |  |
| e56 | 1.135 | 0.002 | 0.095 | 1.000 | 1.130 | 0.963 | 1.334 | 0.290  | 0.183  | 0.804 | 1.598 |  |
| e57 | 3.279 | 0.007 | 0.223 | 1.000 | 3.270 | 2.868 | 3.748 | 0.268  | 0.150  | 2.450 | 4.314 |  |
| e58 | 2.900 | 0.006 | 0.198 | 1.000 | 2.893 | 2.530 | 3.306 | 0.155  | -0.112 | 2.234 | 3.664 |  |
| e59 | 1.881 | 0.004 | 0.143 | 1.000 | 1.874 | 1.611 | 2.172 | 0.174  | -0.029 | 1.336 | 2.464 |  |
| e60 | 1.292 | 0.003 | 0.097 | 1.000 | 1.289 | 1.113 | 1.491 | 0.172  | -0.083 | 0.976 | 1.684 |  |

Table S4. Comparison of Regression Weights Unstandardized Parameter Estimates – Maximum Likelihood versus Bayesian

|                               | Bayesian | ML    |
|-------------------------------|----------|-------|
| MANAG5<--- Career_development | 1.000    | 1.000 |
| MANAG4<---Career_development  | 0.965    | .943  |
| MANAG3<---Career_development  | 1.051    | 1.023 |
| MANAG2<---Career_development  | 1.142    | 1.111 |
| MANAG1<---Career_development  | 1.327    | 1.296 |
| CD8<---Career_development     | 1.273    | 1.240 |
| CD7<---Career_development     | 1.500    | 1.463 |
| CD6<---Career_development     | 1.384    | 1.349 |

|                                                     |       |       |
|-----------------------------------------------------|-------|-------|
| CD5<--Career_development                            | 1.458 | 1.423 |
| CD4<--Career_development                            | 1.469 | 1.432 |
| CD3<--Career_development                            | 0.958 | .934  |
| CD2<--Career_development                            | 1.108 | 1.080 |
| CD1<--Career_development                            | 1.048 | 1.020 |
| RS1 <---Recruitment_and_selection                   | 1.000 | 1.000 |
| RS2<--Recruitment_and_selection                     | 1.378 | 1.258 |
| RS3<--Recruitment_and_selection                     | 1.372 | 1.231 |
| RS4<--Recruitment_and_selection                     | 1.416 | 1.273 |
| RE4<--Recognition_and_value                         | 1.143 | 1.064 |
| RE5<--Recognition_and_value                         | 1.180 | 1.093 |
| RE7<--Recognition_and_value                         | 1.037 | .968  |
| RE8<--Recognition_and_value                         | 1.116 | 1.036 |
| RE9<--Recognition_and_value                         | 0.979 | .910  |
| RE10<--Recognition_and_value                        | 1.063 | .993  |
| RE11<--Recognition_and_value                        | 1.141 | 1.063 |
| RE12<--Recognition_and_value                        | 1.217 | 1.130 |
| RE17<--Recognition_and_value                        | 0.974 | .905  |
| RE19<--Participation_in_research_teams_and_projects | 0.948 | 1.041 |
| RE18<--Participation_in_research_teams_and_projects | 1.025 | 1.127 |
| RE15<--Participation_in_research_teams_and_projects | 1.102 | 1.214 |
| RE14<--Participation_in_research_teams_and_projects | 0.850 | .934  |
| RE13<--Participation_in_research_teams_and_projects | 1.153 | 1.270 |
| RE6<--Participation_in_research_teams_and_projects  | 0.990 | 1.089 |
| Recognition_and_value<--Research_performance        | 0.792 | 0.801 |
| Career_development<--Research_performance           | 0.632 | 0.731 |
| Job_payment <--- Research_performance               | 0.938 | 0.987 |

|                                                                        |       |       |
|------------------------------------------------------------------------|-------|-------|
| Recruitment_and_selection<--Research_performance                       | 0.609 | 0.728 |
| Work_incentives <--- Research_performance                              | 0.877 | 0.902 |
| Participation_in_research_teams_and_projects <--- Research_performance | 0.966 | 0.989 |
| SAL1 <--- Job_payment                                                  | 1.000 | 1.000 |
| SAL2<--Job_payment                                                     | 1.063 | 1.048 |
| Job_payment<--Research_performance                                     | 0.862 | 1.000 |
| WI2<--Work_incentives                                                  | 1.070 | 1.156 |
| WI3<--Work_incentives                                                  | 1.135 | 1.229 |
| WI4<--Work_incentives                                                  | 1.105 | 1.195 |
| WI5<--Work_incentives                                                  | 0.936 | .999  |
